# Supplementary material for: Genetic diversity and family groups detected in a coyote population with red wolf ancestry on Galveston Island, Texas
Source: BMC Ecol Evol. 2022 Nov 14;22:134. doi: 10.1186/s12862-022-02084-9 (PMC9664737; doi:10.1186/s12862-022-02084-9)
Supplement: Supplementary file 1 — Additional file 1. Microsatellite genotypes, ancestry statistics, and identification of private alleles. [file 12862_2022_2084_MOESM1_ESM.xlsx]

## Sheet: genotypes
Sample ID	Type	Genetic Sex	Reliability	103		109		121		172		173		20		200		250		377		2001		2004		2010		2054		2062		2145		225		403
Singles
1	scat	F	0.86	76	76	145	147	109	109	142	156	109	111	130	0	220	220	138	138	170	170	136	140	0	0	224	228	149	153	141	145	0	0	162	164	0	0
15	scat	M	0.93	72	74	149	149	105	105	142	142	107	109	128	132	212	212	136	140	164	164	144	152	237	245	224	224	153	153	133	133	312	312	164	164	281	287
23	scat	M	1	78	78	157	159	103	103	142	152	101	113	130	132	218	220	136	140	158	170	136	140	289	321	232	232	153	157	137	145	292	300	162	164	265	277
31	scat	M	0.99	70	80	145	153	109	109	152	156	103	109	130	132	212	216	138	140	168	168	136	148	285	301	228	232	157	169	133	141	276	276	162	164	279	281
40	scat	F	1	76	78	145	157	103	109	142	152	101	111	130	132	220	220	138	140	170	170	136	140	289	0	224	0	153	157	141	145	280	0	162	162	277	277
49	tissue	M	1	72	80	147	157	109	109	142	142	101	111	130	130	212	224	136	138	164	166	132	148	289	301	224	228	153	157	133	133	280	300	164	166	271	277
289	scat	M	1	78	78	147	157	103	109	142	152	111	113	130	130	218	218	138	138	170	170	136	140	289	321	228	232	153	153	137	145	292	292	162	164	265	283
293	scat	F	1	76	78	145	151	103	107	142	152	113	113	122	130	218	218	136	138	158	164	136	140	289	305	228	232	149	161	137	149	292	292	162	166	277	277
297	scat	U	0.87	80	80	145	151	105	111	156	156	105	111	122	128	218	220	132	140	166	172	140	148	0	0	232	0	153	161	137	141	288	288	164	164	0	0
307	scat	F	0.69	70	70	145	151	103	111	156	158	109	111	122	0	216	218	132	136	164	0	144	148	289	293	228	232	153	153	149	149	300	300	162	164	279	0
313	tissue	M		70	74	145	153	109	109	158	158	105	113	122	126	216	218	140	142	162	162	144	144	289	289	228	232	153	161	137	145	292	292	162	162	279	283
332	scat	M	0.99	78	78	147	157	103	109	142	142	101	111	130	132	218	220	138	140	170	170	136	136	289	289	228	232	153	153	137	141	292	300	162	164	277	0
342	scat	M	1	78	80	145	153	103	111	142	156	109	111	122	122	214	220	132	136	164	172	144	148	237	321	228	232	153	153	141	149	288	304	164	166	267	279
352	scat	M	1	64	70	149	151	109	111	154	156	97	103	128	130	218	218	140	150	170	170	148	152	289	293	232	232	157	157	137	149	292	300	164	166	283	0
356	scat	M	1	76	80	145	151	103	105	156	158	105	109	128	134	218	220	136	140	164	166	140	144	289	293	228	232	153	153	137	149	288	304	164	166	279	287
500	scat	M	1	74	80	147	153	101	103	142	154	101	115	128	134	212	216	140	140	168	170	144	148	233	297	224	228	153	157	137	145	280	300	164	170	267	275
504	scat	M	0.93	76	76	147	159	103	103	142	152	111	111	130	130	218	220	138	138	158	170	140	140	285	289	228	232	153	157	141	141	280	292	162	164	277	283
510	scat	F	1	74	76	149	157	103	111	142	154	97	109	122	122	214	218	138	148	156	164	144	148	293	309	224	232	153	153	133	137	288	292	164	164	271	287
554	tissue	M		80	80	151	151	103	111	142	156	97	105	122	122	218	218	140	150	170	172	140	156	237	321	228	232	153	153	137	149	268	288	162	164	279	287
555	tissue	F		76	80	149	151	99	105	156	156	109	109	122	130	218	220	136	136	164	164	144	156	237	305	228	232	157	157	137	137	268	280	164	166	279	279
556	tissue	F		72	74	145	149	109	109	142	162	105	105	122	130	212	212	150	150	158	168	140	152	277	293	228	0	153	157	133	141	280	292	162	166	283	287
557	tissue	U		74	78	147	157	103	109	142	152	109	113	130	132	218	0	136	138	170	170	136	0	0	0	232	0	0	0	141	145	292	292	164	164	277	277
558	tissue	M		76	80	149	151	99	103	156	156	109	113	130	134	216	220	136	140	164	172	140	144	293	305	232	232	157	161	137	137	288	296	162	164	279	281
559	tissue	M		74	78	145	157	99	109	152	156	97	103	128	134	214	214	138	138	156	156	148	156	243	301	224	232	153	169	133	137	280	292	162	164	267	271
560	tissue	F		80	80	145	151	105	109	142	154	109	109	128	132	220	224	140	140	158	164	136	140	241	289	224	228	153	153	137	137	288	292	162	164	281	283
562	tissue	F		78	78	147	151	107	107	142	142	103	105	122	122	212	218	136	140	158	168	136	152	301	301	228	232	153	157	133	137	300	308	162	164	279	287
672	tissue	M		76	80	149	153	107	109	154	154	103	111	128	134	212	220	136	140	170	178	144	152	297	301	224	232	157	157	137	137	292	300	164	170	275	279
693	tissue	F		74	78	149	149	97	107	142	156	101	105	126	130	212	220	142	142	152	154	136	152	285	305	220	232	153	153	133	133	264	280	162	164	283	283
695	tissue	F		74	80	147	149	103	111	142	156	97	113	126	128	218	218	146	146	148	164	136	148	281	305	220	232	153	153	137	141	292	296	166	168	271	271
696	tissue	F		72	78	149	149	101	107	142	142	103	109	126	132	216	216	148	150	154	170	148	152	285	297	228	232	153	157	133	133	280	284	160	164	283	285
697	tissue	M		70	72	151	151	109	111	154	158	97	103	128	130	216	218	140	150	170	170	148	152	293	321	232	232	157	157	137	149	292	300	164	166	267	283
700	tissue	F		76	80	147	151	109	109	142	156	105	107	130	130	210	216	136	138	166	170	148	148	289	301	224	228	153	157	141	141	264	300	164	164	277	277
702	tissue	M		72	76	145	149	103	103	142	152	97	97	122	122	212	212	142	142	164	166	140	156	233	293	228	232	153	173	133	137	264	284	164	166	285	287
703	tissue	F		70	72	151	151	109	111	154	158	101	111	128	128	216	218	132	140	166	170	144	148	289	321	232	232	153	157	137	137	268	292	164	164	267	279
704	tissue	M		76	76	145	157	103	103	152	152	101	111	130	130	218	220	138	138	158	170	136	140	285	289	228	232	153	157	141	145	280	292	162	162	277	283
709	scat	M	1	76	80	149	151	99	103	156	158	109	113	122	130	218	220	136	140	164	164	136	140	237	305	232	232	157	161	137	137	268	280	162	166	281	287
735	scat	M	0.3	64	64	145	157	103	109	158	158	105	105	134	0	218	218	140	142	162	162	144	148	289	289	224	232	153	161	137	145	276	284	162	162	0	0
743	scat	U	0.56	76	76	147	149	99	109	158	158	109	113	130	130	220	0	136	136	164	164	132	144	241	305	232	232	153	153	137	137	0	0	0	0	0	0
833	scat	M	0.99	64	70	145	151	103	105	142	142	97	111	122	128	218	220	132	150	164	166	140	144	305	321	232	232	153	153	141	145	268	284	164	166	267	0
887	scat	M	1	76	76	153	157	103	103	142	152	113	113	130	134	212	218	136	138	166	170	136	140	285	297	228	232	157	161	133	137	292	292	162	166	277	283
893	scat	F	0.95	64	70	151	151	103	105	156	158	97	111	122	128	216	218	132	136	170	172	148	156	289	321	232	232	153	153	141	149	288	304	164	166	267	267
919	scat	M	0.54	80	80	151	153	103	103	142	142	97	109	134	0	218	0	136	150	164	164	144	156	241	321	228	232	153	157	149	149	268	0	0	0	267	267
931	tissue	F		76	76	149	157	103	105	154	156	97	99	122	122	212	224	140	142	164	166	136	140	233	293	236	236	153	153	137	141	292	0	162	166	283	287
932	tissue	F		68	70	147	149	105	109	154	156	103	113	136	136	212	224	132	138	156	170	132	140	297	325	232	232	153	153	133	141	292	292	160	162	285	285
933	tissue	F		76	80	149	157	105	109	142	154	105	107	128	130	212	212	136	140	170	172	144	148	297	301	224	228	161	161	133	133	284	288	164	166	283	287
952	scat	M	1	76	80	149	149	111	111	142	158	97	101	126	128	212	220	142	150	164	168	136	136	305	309	232	232	145	157	145	145	284	288	162	164	273	281
992	scat	M	1	64	64	145	149	105	111	158	158	109	111	130	130	218	218	142	146	164	172	136	148	237	305	224	232	149	157	137	149	288	308	164	164	271	287
996	tissue	M		74	76	157	159	103	109	142	142	101	101	130	130	218	220	138	140	158	158	136	140	285	289	228	232	153	157	141	145	292	292	162	164	277	283
997	tissue	M		70	72	151	153	103	111	156	156	105	109	122	122	216	218	136	140	164	172	144	148	293	321	228	232	153	157	137	141	268	288	164	164	279	279
998	tissue	F		72	76	147	153	103	103	142	158	105	111	122	122	218	224	136	140	162	166	148	156	297	305	232	232	153	161	137	149	280	292	162	168	267	287
1000	tissue	M		74	78	145	153	103	109	142	142	97	109	122	130	212	218	136	138	158	166	140	148	289	305	228	228	157	161	133	137	280	292	162	164	277	283
matches
698	tissue	M		80	80	145	153	103	111	142	156	97	105	122	128	218	218	132	146	166	170	148	156	237	321	232	232	157	157	141	149	288	304	164	166	267	287
701	tissue	M		80	80	145	153	103	111	142	156	97	105	122	128	218	218	132	146	166	170	148	156	237	321	232	232	157	157	141	149	288	304	164	166	267	287
440	scat		1	80	80	145	153	103	111	142	142	97	105	122	128	218	218	132	146	166	170
320	scat	M	1	70	80	147	151	107	109	142	152	101	101	122	130	220	220	136	140	170	170	136	148	245	293	224	232	153	153	133	137	288	292	164	164	279	279
905	scat		1	70	80	147	151	107	109	142	152	101	101	122	130	220	220	136	140	170	170
721	scat		0.98	70	80	147	151	107	109	142	152	101	101	122	130	220	220	0	0	170	170
27	scat	M	1	76	76	147	159	103	109	142	152	111	113	130	132	220	220	138	140	170	170	136	136	285	289	228	232	153	153	145	145	292	300	162	162	277	283
37	scat		0.96	76	76	147	159	103	109	142	152	111	113	130	132	220	220	138	140	170	170
348	scat		0.99	76	0	147	159	103	109	142	152	111	113	130	132	220	220	138	140	170	170
857	scat	F	0.99	70	76	149	151	103	103	154	158	97	101	128	130	218	218	140	150	166	170	152	156	289	321	232	232	157	157	137	137	292	300	164	166	267	0
911	scat		0.85	70	76	149	151	103	103	154	158	97	101	128	130	218	218	140	150	166	170
673	tissue	M		70	72	149	151	103	109	154	156	101	111	128	130	216	218	132	140	166	170	144	148	289	321	232	232	157	157	137	149	292	300	164	166	279	279
699	tissue	M		70	72	149	151	103	109	154	156	101	111	128	130	218	218	132	140	166	170	144	148	289	321	232	232	157	157	137	149	292	300	164	166	279	279
451	scat		1	70	72	149	151	103	109	154	156	101	111	128	130	216	218	132	140	166	170
934	scat	M	1	74	78	149	153	109	111	142	158	97	105	128	130	212	218	138	140	164	168	144	152	237	301	224	224	153	157	133	137	288	312	164	164	281	287
942	scat		0.94	74	78	149	153	109	111	142	158	97	105	128	130	212	218	138	140	164	168
938	scat		1	0	78	149	153	109	111	142	158	97	105	0	130	212	218	138	140	164	168
316	scat	F	1	64	70	149	159	103	103	142	152	101	113	128	132	218	224	136	140	158	170	136	140	289	289	228	232	153	157	149	149	280	280	164	166	265	277
962	scat		1	64	70	149	159	103	103	142	152	101	113	128	132	218	224	136	140	158	170
415	scat		1	64	70	149	159	103	103	142	152	101	113	128	0	218	224	136	140	158	170
763	scat		0.9	64	70	149	159	103	103	142	152	101	113	128	132	218	0	136	140	158	170
901	scat	F	1	70	70	151	159	103	109	142	142	101	113	128	130	218	218	136	140	170	170	136	140	245	305	224	232	153	157	137	149	280	288	164	166	277	279
966	scat		1	70	70	151	159	103	109	142	142	101	113	128	130	218	218	136	140	170	170
899	scat		0.92	70	70	151	159	103	109	142	142	101	113	128	130	218	0	136	140	170	170
964	scat		0.21	70	0	151	151	103	109	142	142	101	113	128	0	218	0	136	140	170	170
705	scat	F	0.93	74	78	149	149	109	111	154	154	105	113	126	136	212	0	138	140	162	170	140	152	285	297	232	232	153	157	141	145	292	292	164	164	279	0
771	scat		0.95	74	78	149	149	109	111	154	154	105	113	0	136	212	216	138	140	162	0
7	scat	M	1	80	80	151	153	103	105	142	156	97	105	128	134	216	220	136	140	170	172	144	148	289	293	228	232	157	157	141	149	300	304	162	164	279	279
435	scat		0.99	80	80	151	153	103	105	142	156	97	105	128	0	220	220	136	140	170	172
486	scat	F	1	70	70	145	153	103	105	156	158	97	105	122	128	216	218	132	150	166	170	144	148	237	321	232	232	157	157	137	149	268	300	164	166	267	279
488	scat		1	70	70	145	153	103	105	156	158	97	105	122	128	216	218	132	150	166	170
755	scat	M	0.86	74	80	147	153	101	109	154	154	103	115	126	134	0	216	140	140	170	170	144	144	0	0	228	232	157	157	137	137	0	0	164	166	275	275
759	scat	M	0.99	74	80	147	153	101	109	154	154	103	115	126	0	212	216	140	140	170	178	144	144	237	321	232	0	157	157	137	137	292	292	164	166	275	275
968	scat	F	1	70	76	149	151	103	109	154	154	101	103	128	130	216	218	140	140	170	170	144	152	293	321	232	232	153	157	137	137	292	292	164	166	279	283
324	scat	U	0.88	70	76	149	151	103	109	154	154	101	103	130	130	216	218	140	140	170	170	144	152	0	0	0	0	0	157	137	137	292	0	0	0	0	0
853	scat	M	0.7	70	74	149	151	103	103	142	154	101	103	128	130	218	218	140	140	170	0	136	136	293	321	232	232	153	157	137	137	0	0	166	0	0	0
913	scat	M	0.98	70	74	149	151	103	103	142	154	101	103	128	130	218	218	140	140	170	170	136	152	293	321	232	232	157	157	137	137	300	0	0	0	285	0
869	scat	F	0.78	76	76	149	149	103	109	142	158	103	113	122	130	218	218	140	140	164	170	136	136	321	0	0	0	153	157	137	0	0	0	166	0	279	279
917	scat	F	1	70	76	147	149	103	109	142	158	103	113	0	130	218	218	140	140	164	170	132	136	305	321	232	232	153	157	137	137	280	0	166	166	279	279
879	scat	M	0.96	72	76	149	149	99	103	154	158	109	113	130	130	218	220	136	140	164	164	132	144	293	305	232	232	157	161	137	137	280	296	164	166	279	281
927	scat		1	70	76	149	149	99	103	154	158	109	113	130	130	220	220	136	140	164	164
999	tissue	M		76	80	151	151	103	105	156	158	109	111	122	122	216	220	132	136	166	170	144	148	237	321	232	232	153	153	141	149	268	288	162	164	267	279
713	scat	M	0.98	80	0	151	151	103	105	158	158	109	111	122	122	216	220	132	136	166	170	144	148	237	321	232	232	153	153	141	149	268	288	162	164	279	0

## Sheet: ancestry
	MTU	Structure q (%)					Structure (credible interval)					17 Loci	Structure q (%)					15 Loci	Structure q (%)
	Sample	DO	GW	MW	RW	CO	DO	GW	MW	RW	CO	Sample	DO	GW	MW	RW	CO	Sample	DO	GW	MW	RW	CO
	1	2.2	2.4	1.3	13.9	80.2	0,0.158	(0.000,0.172)	(0.000,0.095)	(0.000,0.483)	(0.463,1.000)	1	2.2	2.4	1.3	13.9	80.2	1	0	0	0	0	0
	7	1.3	1.1	0.9	13.5	83.2	0,0.085	(0.000,0.074)	(0.000,0.060)	(0.000,0.346)	(0.603,1.000)	7	1.3	1.1	0.9	13.5	83.2	7	0	0	0	0	0
	15	4.2	4	0.8	2.1	88.9	0,0.227	(0.000,0.225)	(0.000,0.053)	(0.000,0.135)	(0.628,1.000)	15	4.2	4	0.8	2.1	88.9	15	0	0	0	0	0
	23	0.9	2.1	1.6	14.7	80.7	(0.000,0.056)	(0.000,0.140)	(0.000,0.082)	(0.000,0.394)	(0.534,1.000)	23	0.9	2.1	1.6	14.7	80.7	23	0	0	0	0	0
	27	0.5	0.6	4.6	16.1	78.1	(0.000,0.028)	(0.000,0.037)	(0.000,0.173)	(0.000,0.413)	(0.510,0.998)	27	0.5	0.6	4.6	16.1	78.1	27	0	0	0	0	0
	31	21.6	1.3	10	2.1	65	(0.000,0.552)	(0.000,0.084)	(0.000,0.287)	(0.000,0.150)	(0.284,0.989)	31	21.6	1.3	10	2.1	65	31	0	0	0	0	0
	40	0.9	2.1	4.5	3.7	88.9	(0.000,0.054)	(0.000,0.155)	(0.000,0.177)	(0.000,0.228)	(0.649,1.000)	40	0.9	2.1	4.5	3.7	88.9	40	0	0	0	0	0
	49	5	1.1	1.1	50.2	42.6	(0.000,0.223)	(0.000,0.074)	(0.000,0.077)	(0.250,0.753)	(0.153,0.695)	49	5	1.1	1.1	50.2	42.6	49	0	0	0	0	0
	289	2	2.5	5.4	9.5	80.5	(0.000,0.127)	(0.000,0.167)	(0.000,0.195)	(0.000,0.369)	(0.505,1.000)	289	2	2.5	5.4	9.5	80.5	289	0	0	0	0	0
	293	0.8	1.9	4.6	17.8	74.8	(0.000,0.050)	(0.000,0.131)	(0.000,0.175)	(0.000,0.503)	(0.410,1.000)	293	0.8	1.9	4.6	17.8	74.8	293	0	0	0	0	0
	297	23	6.6	5.5	9	56	(0.000,0.799)	(0.000,0.375)	(0.000,0.270)	(0.000,0.433)	(0.000,0.996)	297	23	6.6	5.5	9	56	297	0	0	0	0	0
	307	1.3	4.8	0.4	27	66.4	(0.000,0.087)	(0.000,0.311)	(0.000,0.026)	(0.000,0.509)	(0.356,0.942)	307	1.3	4.8	0.4	27	66.4	307	0	0	0	0	0
	313	0.6	4	7.8	2	85.5	(0.000,0.037)	(0.000,0.266)	(0.000,0.304)	(0.000,0.134)	(0.574,1.000)	313	0.6	4	7.8	2	85.5	313	0	0	0	0	0
	316	0.7	1.9	2	24.5	70.9	(0.000,0.043)	(0.000,0.128)	(0.000,0.096)	(0.000,0.490)	(0.440,0.975)	316	0.7	1.9	2	24.5	70.9	316	0	0	0	0	0
	320	2.8	2.6	4.6	2	88.1	(0.000,0.185)	(0.000,0.184)	(0.000,0.176)	(0.000,0.140)	(0.617,1.000)	320	2.8	2.6	4.6	2	88.1	320	0	0	0	0	0
	332	1	1.3	0.4	18.4	78.9	(0.000,0.061)	(0.000,0.092)	(0.000,0.026)	(0.000,0.429)	(0.529,1.000)	332	1	1.3	0.4	18.4	78.9	332	0	0	0	0	0
	342	3.3	2.2	0.8	11.9	81.7	(0.000,0.227)	(0.000,0.157)	(0.000,0.056)	(0.000,0.406)	(0.507,1.000)	342	3.3	2.2	0.8	11.9	81.7	342	0	0	0	0	0
	352	0.9	2.6	0.3	29.4	66.8	(0.000,0.055)	(0.000,0.183)	(0.000,0.017)	(0.000,0.552)	(0.386,0.981)	352	0.9	2.6	0.3	29.4	66.8	352	0	0	0	0	0
	356	1.2	5	0.8	11.1	81.9	(0.000,0.077)	(0.000,0.309)	(0.000,0.050)	(0.000,0.368)	(0.510,1.000)	356	1.2	5	0.8	11.1	81.9	356	0	0	0	0	0
	486	4.2	4.1	6.6	15.9	69.2	(0.000,0.269)	(0.000,0.269)	(0.000,0.279)	(0.000,0.412)	(0.379,0.983)	486	4.2	4.1	6.6	15.9	69.2	486	0	0	0	0	0
	500	5.1	3.6	3.7	8.7	78.9	(0.000,0.284)	(0.000,0.197)	(0.000,0.213)	(0.000,0.309)	(0.468,1.000)	500	5.1	3.6	3.7	8.7	78.9	500	0	0	0	0	0
	504	0.7	1.1	6.2	32.1	60	(0.000,0.038)	(0.000,0.073)	(0.000,0.208)	(0.000,0.586)	(0.326,0.907)	504	0.7	1.1	6.2	32.1	60	504	0	0	0	0	0
	510	0.7	3.4	0.5	50.6	44.9	(0.000,0.040)	(0.000,0.231)	(0.000,0.032)	(0.216,0.761)	(0.175,0.744)	510	0.7	3.4	0.5	50.6	44.9	510	0	0	0	0	0
	554	5.3	2.5	2.2	3.5	86.5	(0.000,0.320)	(0.000,0.171)	(0.000,0.140)	(0.000,0.220)	(0.558,1.000)	554	5.3	2.5	2.2	3.5	86.5	554	0	0	0	0	0
	555	2.3	2.8	1.3	3.8	89.8	(0.000,0.164)	(0.000,0.202)	(0.000,0.091)	(0.000,0.249)	(0.605,1.000)	555	2.3	2.8	1.3	3.8	89.8	555	0	0	0	0	0
	556	1	1.5	3.2	33.1	61.2	(0.000,0.063)	(0.000,0.099)	(0.000,0.195)	(0.000,0.620)	(0.333,0.928)	556	1	1.5	3.2	33.1	61.2	556	0	0	0	0	0
	557	0.9	1.3	5	4.2	88.5	(0.000,0.053)	(0.000,0.088)	(0.000,0.190)	(0.000,0.275)	(0.623,1.000)	557	0.9	1.3	5	4.2	88.5	557	0	0	0	0	0
	558	1	1.4	0.5	1.6	95.5	(0.000,0.063)	(0.000,0.096)	(0.000,0.031)	(0.000,0.116)	(0.779,1.000)	558	1	1.4	0.5	1.6	95.5	558	0	0	0	0	0
	559	14.1	2.1	7.2	32.8	43.7	(0.000,0.490)	(0.000,0.140)	(0.000,0.236)	(0.000,0.633)	(0.108,0.777)	559	14.1	2.1	7.2	32.8	43.7	559	0	0	0	0	0
	560	1	1.6	0.7	8.5	88.3	(0.000,0.063)	(0.000,0.113)	(0.000,0.048)	(0.000,0.322)	(0.616,1.000)	560	1	1.6	0.7	8.5	88.3	560	0	0	0	0	0
	562	5	4.1	1.4	40	49.5	(0.000,0.271)	(0.000,0.229)	(0.000,0.094)	(0.095,0.669)	(0.140,0.813)	562	5	4.1	1.4	40	49.5	562	0	0	0	0	0
	672	2.7	2.7	0.6	11.5	82.5	(0.000,0.173)	(0.000,0.173)	(0.000,0.039)	(0.000,0.366)	(0.540,1.000)	672	2.7	2.7	0.6	11.5	82.5	672	0	0	0	0	0
	673	1.1	10.2	0.5	16.8	71.4	(0.000,0.075)	(0.000,0.454)	(0.000,0.032)	(0.000,0.425)	(0.354,1.000)	673	1.1	10.2	0.5	16.8	71.4	673	0	0	0	0	0
	693	3.8	1.2	1	4.9	89.2	(0.000,0.228)	(0.000,0.078)	(0.000,0.066)	(0.000,0.276)	(0.635,1.000)	693	3.8	1.2	1	4.9	89.2	693	0	0	0	0	0
	695	3.4	1.1	0.3	2	93.2	(0.000,0.204)	(0.000,0.071)	(0.000,0.020)	(0.000,0.141)	(0.719,1.000)	695	3.4	1.1	0.3	2	93.2	695	0	0	0	0	0
	696	19.4	2.1	0.8	3.3	74.4	(0.000,0.528)	(0.000,0.137)	(0.000,0.055)	(0.000,0.207)	(0.410,1.000)	696	19.4	2.1	0.8	3.3	74.4	696	0	0	0	0	0
	697	1.2	1.5	0.4	13.6	83.2	(0.000,0.081)	(0.000,0.102)	(0.000,0.025)	(0.000,0.379)	(0.576,1.000)	697	1.2	1.5	0.4	13.6	83.2	697	0	0	0	0	0
	698	1.4	1.1	2.4	25.5	69.6	(0.000,0.098)	(0.000,0.073)	(0.000,0.156)	(0.000,0.554)	(0.394,0.999)	698	1.4	1.1	2.4	25.5	69.6	698	0	0	0	0	0
	700	1	1.1	2.4	37.3	58.3	(0.000,0.061)	(0.000,0.073)	(0.000,0.151)	(0.141,0.604)	(0.340,0.823)	700	1	1.1	2.4	37.3	58.3	700	0	0	0	0	0
	702	3	8.1	4.2	1.8	82.9	(0.000,0.183)	(0.000,0.333)	(0.000,0.165)	(0.000,0.129)	(0.562,1.000)	702	3	8.1	4.2	1.8	82.9	702	0	0	0	0	0
	703	5.5	3.3	0.6	3.6	87	(0.000,0.349)	(0.000,0.224)	(0.000,0.039)	(0.000,0.224)	(0.541,1.000)	703	5.5	3.3	0.6	3.6	87	703	0	0	0	0	0
	704	0.8	1.1	13.6	29.7	54.7	(0.000,0.048)	(0.000,0.070)	(0.002,0.292)	(0.000,0.577)	(0.260,0.867)	704	0.8	1.1	13.6	29.7	54.7	704	0	0	0	0	0
	705	0.7	32.2	1	7.8	58.3	(0.000,0.040)	(0.000,0.705)	(0.000,0.072)	(0.000,0.375)	(0.130,0.999)	705	0.7	32.2	1	7.8	58.3	705	0	0	0	0	0
	709	0.8	2.6	1.2	7.3	88.1	(0.000,0.054)	(0.000,0.182)	(0.000,0.084)	(0.000,0.385)	(0.550,1.000)	709	0.8	2.6	1.2	7.3	88.1	709	0	0	0	0	0
	735	0.7	8.8	3.6	9.8	77.1	(0.000,0.044)	(0.000,0.451)	(0.000,0.210)	(0.000,0.384)	(0.421,1.000)	735	0.7	8.8	3.6	9.8	77.1	735	0	0	0	0	0
	743	5	0.8	0.7	3.1	90.4	(0.000,0.236)	(0.000,0.048)	(0.000,0.048)	(0.000,0.221)	(0.643,1.000)	743	5	0.8	0.7	3.1	90.4	743	0	0	0	0	0
	759	2.4	5.6	12.1	1.1	78.8	(0.000,0.146)	(0.000,0.275)	(0.000,0.388)	(0.000,0.069)	(0.444,1.000)	759	2.4	5.6	12.1	1.1	78.8	759	0	0	0	0	0
	833	1.1	1.5	0.4	1.7	95.2	(0.000,0.071)	(0.000,0.107)	(0.000,0.028)	(0.000,0.125)	(0.773,1.000)	833	1.1	1.5	0.4	1.7	95.2	833	0	0	0	0	0
	853	0.9	2.9	0.4	7.8	88	(0.000,0.054)	(0.000,0.198)	(0.000,0.021)	(0.000,0.316)	(0.597,1.000)	853	0.9	2.9	0.4	7.8	88	853	0	0	0	0	0
	857	0.8	1.6	0.5	31.9	65.3	(0.000,0.046)	(0.000,0.111)	(0.000,0.028)	(0.000,0.600)	(0.361,0.978)	857	0.8	1.6	0.5	31.9	65.3	857	0	0	0	0	0
	879	2.4	1.5	0.4	5.7	90	(0.000,0.137)	(0.000,0.101)	(0.000,0.026)	(0.000,0.329)	(0.617,1.000)	879	2.4	1.5	0.4	5.7	90	879	0	0	0	0	0
	887	0.8	1.1	8.6	2	87.5	(0.000,0.047)	(0.000,0.075)	(0.000,0.253)	(0.000,0.144)	(0.658,1.000)	887	0.8	1.1	8.6	2	87.5	887	0	0	0	0	0
	893	1.7	0.9	0.5	7	89.9	(0.000,0.120)	(0.000,0.059)	(0.000,0.031)	(0.000,0.301)	(0.646,1.000)	893	1.7	0.9	0.5	7	89.9	893	0	0	0	0	0
	901	0.6	1.3	0.3	0.8	97	(0.000,0.038)	(0.000,0.083)	(0.000,0.019)	(0.000,0.050)	(0.845,1.000)	901	0.6	1.3	0.3	0.8	97	901	0	0	0	0	0
	917	2.5	2.3	0.8	2.4	92	(0.000,0.140)	(0.000,0.163)	(0.000,0.054)	(0.000,0.171)	(0.689,1.000)	917	2.5	2.3	0.8	2.4	92	917	0	0	0	0	0
	919	1.8	0.6	0.6	0.7	96.3	(0.000,0.127)	(0.000,0.033)	(0.000,0.036)	(0.000,0.046)	(0.813,1.000)	919	1.8	0.6	0.6	0.7	96.3	919	0	0	0	0	0
	931	0.9	14.5	0.8	10.2	73.6	(0.000,0.054)	(0.000,0.470)	(0.000,0.055)	(0.000,0.384)	(0.363,1.000)	931	0.9	14.5	0.8	10.2	73.6	931	0	0	0	0	0
	932	9.7	18.9	0.4	5.7	65.2	(0.000,0.325)	(0.000,0.515)	(0.000,0.028)	(0.000,0.242)	(0.300,0.978)	932	9.7	18.9	0.4	5.7	65.2	932	0	0	0	0	0
	933	1.7	10.4	1.3	7.5	79.1	(0.000,0.119)	(0.000,0.429)	(0.000,0.094)	(0.000,0.363)	(0.456,1.000)	933	1.7	10.4	1.3	7.5	79.1	933	0	0	0	0	0
	934	3.3	1.6	2.8	15.3	76.9	(0.000,0.205)	(0.000,0.108)	(0.000,0.177)	(0.000,0.475)	(0.441,1.000)	934	3.3	1.6	2.8	15.3	76.9	934	0	0	0	0	0
	952	0.4	0.4	0.9	5.1	93.2	(0.000,0.026)	(0.000,0.024)	(0.000,0.056)	(0.000,0.298)	(0.680,1.000)	952	0.4	0.4	0.9	5.1	93.2	952	0	0	0	0	0
	968	1.5	7.5	0.4	1.1	89.4	(0.000,0.099)	(0.000,0.383)	(0.000,0.024)	(0.000,0.075)	(0.568,1.000)	968	1.5	7.5	0.4	1.1	89.4	968	0	0	0	0	0
	992	5.2	3.6	0.4	13	77.7	(0.000,0.281)	(0.000,0.223)	(0.000,0.028)	(0.000,0.423)	(0.465,1.000)	992	5.2	3.6	0.4	13	77.7	992	0	0	0	0	0
	996	0.5	0.9	0.5	16.1	82	(0.000,0.026)	(0.000,0.058)	(0.000,0.030)	(0.000,0.464)	(0.511,1.000)	996	0.5	0.9	0.5	16.1	82	996	0	0	0	0	0
	997	6.1	5.4	1.9	3.2	83.5	(0.000,0.348)	(0.000,0.328)	(0.000,0.123)	(0.000,0.209)	(0.494,1.000)	997	6.1	5.4	1.9	3.2	83.5	997	0	0	0	0	0
	998	0.5	4.3	6.9	23.9	64.4	(0.000,0.032)	(0.000,0.271)	(0.000,0.276)	(0.000,0.538)	(0.348,0.939)	998	0.5	4.3	6.9	23.9	64.4	998	0	0	0	0	0
	999	5.4	4.3	3	1.5	85.9	(0.000,0.322)	(0.000,0.280)	(0.000,0.183)	(0.000,0.102)	(0.545,1.000)	999	5.4	4.3	3	1.5	85.9	999	0	0	0	0	0
	1000	1.2	1	6.7	30	61.1	(0.000,0.082)	(0.000,0.067)	(0.000,0.300)	(0.000,0.614)	(0.281,0.961)	1000	1.2	1	6.7	30	61.1	1000	0	0	0	0	0

## Sheet: private alleles
Mainland Texas	Red wolf ancestry (%)		NPA
15	2.3	2
556	33.8	1
559	32.9	1
932	5.7	1
934	16.1	1
Galveston Island
23	15	1
289	9.9	1
316	24.5	1
500	8.9	1
672	11	1
759	1	1
